# Supplementary material
Source: PubMed Central journal article supplement (PMC5177557)
Supplement: 10-1055-s-0042-118335-sup_gf1105.pdf [file 10-1055-s-0042-118335-sup_gf1105.pdf]

# Geburt nach vorausgegangenem Kaiserschnitt

## Empfehlung der Österreichischen Gesellschaft für Gynäkologie und Geburtshilfe (OEGGG)

### Labour and Childbirth After Previous Caesarean Section

### Recommendations of the Austrian Society of Obstetrics and Gynaecology (OEGGG)

#### Autoren

P. Reif<sup>1</sup>, C. Brezinka<sup>2</sup>, T. Fischer<sup>3</sup>, P. Husslein<sup>4</sup>, U. Lang<sup>1</sup>, A. Ramoni<sup>5</sup>, H. Zeisler<sup>4</sup>, P. Klaritsch<sup>1</sup>

#### Institute

Die Institutsangaben sind am Ende des Beitrags gelistet.

#### Schlüsselwörter

- Kaiserschnitt
- Zustand nach Kaiserschnitt
- vaginale Geburt
- Management
- Empfehlung
- Bewertung

#### Key words

- caesarean section
- status after caesarean section
- vaginal delivery
- management
- recommendation
- assessment

#### Bibliografie

**DOI** <http://dx.doi.org/10.1055/s-0042-118335>  
 Geburtsh Frauenheilk 2016; 76:  
 1–9 © Georg Thieme Verlag KG  
 Stuttgart · New York ·  
 ISSN 0016-5751

#### Korrespondenzadresse

**Assoc. Prof. PD Dr.  
 Philipp Klaritsch**  
 Universitätsklinik für Frauen-  
 heilkunde und Geburtshilfe  
 Medizinische Universität Graz  
 Auenbruggerplatz 14  
 8036 Graz  
 Österreich  
 philipp.klaritsch@  
 medunigraz.at

#### Zusammenfassung

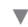

Die neue Expertenempfehlung der Österreichischen Gesellschaft für Gynäkologie und Geburtshilfe (OEGGG) stellt eine Zusammenfassung und Interpretation der Guidelines der weltweit führenden Fachgesellschaften und Organisationen (RCOG, ACOG, SOGC, CNGOF, WHO, NIH, NICE, UpToDate) dar. In ihrer Kernaussage zeigt die Empfehlung Alternativen zum direkten Weg zur geplanten Re-Section auf. Sie folgt damit dem internationalen Trend, der stattdessen ein differenziertes, individualisiertes klinisches Management unter Abwägen mütterlicher und kindlicher Vorteile und Risiken sowie eine detaillierte Aufklärung und Miteinbeziehung der Wünsche der Schwangeren empfiehlt. Angesichts guter Erfolgsraten für eine vaginale Geburt nach Kaiserschnitt von 60–85% gewinnt das Einbeziehen von prädiktiven Faktoren in die antenatale Geburtsplanung zunehmend an Wichtigkeit. Die Empfehlung versteht sich als kompakte Handlungsempfehlung für die meisten klinischen Standardsituationen, kann jedoch niemals alle potenziellen Einzelsituationen abdecken. Das individuelle Bewerten aller Faktoren und damit die Entscheidung über den tatsächlichen Entbindungsmodus bleibt letztendlich im Ermessen des behandelnden Facharzts/der behandelnden Fachärztin.

#### Zusammenfassung der Empfehlungen für Frauen nach vorausgegangenem Kaiserschnitt

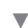

1. Die überwiegende Mehrheit der betroffenen Schwangeren erfüllt die Voraussetzungen für einen vaginalen Entbindungsversuch und soll darüber aufgeklärt werden (ACOG – Level 1). Dies gilt insbesondere bei *einem* vorausgegangenem Kaiserschnitt und vorliegender Einlingsschwangerschaft in Schädellage mit

#### Abstract

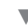

The new expert recommendation from the Austrian Society of Obstetrics and Gynaecology (OEGGG) comprises an interpretation and summary of guidelines from the leading specialist organisations worldwide (RCOG, ACOG, SOGC, CNGOF, WHO, NIH, NICE, UpToDate). In essence it outlines alternatives to the direct pathway to elective repeat caesarean section (ERCS). In so doing it aligns with international trends, according to which a differentiated, individualised clinical approach is recommended that considers benefits and risks to both mother and child, provides detailed counselling and takes the patient's wishes into account. In view of good success rates (60–85%) for vaginal birth after caesarean section (VBAC) the consideration of predictive factors during antenatal birth planning has become increasingly important. This publication provides a compact management recommendation for the majority of standard clinical situations. However it cannot and does not claim to cover all possible scenarios. The consideration of all relevant factors in each individual case, and thus the ultimate decision on mode of delivery, remains the discretion and responsibility of the treating obstetrician.

einem Gestationsalter >37.SSW (RCOG – Grad B).

2. Die Schwangere soll darüber aufgeklärt werden, dass die Erfolgsrate für eine vaginale Entbindung bei 60–85% liegt (SOGC, ACOG, RCOG – Grad C).
3. Die Schwangere soll darüber aufgeklärt werden, dass eine erfolgreiche vaginale Entbindung die geringste Komplikationsrate mit sich bringt (RCOG-Grad B).

4. Die Schwangere soll darüber aufgeklärt werden, dass nach erfolglosem vaginalen Entbindungsversuch gelegentlich ein akuter Kaiserschnitt notwendig wird, der mit einer erhöhten Komplikationsrate einhergeht (RCOG – Grad B).
5. Die Schwangere soll darüber informiert werden, dass das Risiko einer Uterusruptur bei vaginaler Geburt bei ca. 0,5% (1 von 200) liegt (RCOG – Grad B).
6. Die Schwangere soll darüber aufgeklärt werden, dass das Risiko eines geburtsassoziierten perinatalen kindlichen Todesfalls bei vaginaler Entbindung nach Kaiserschnitt insgesamt äußerst gering und vergleichbar mit dem Risiko bei Spontangeburt einer Erstgebärenden ist (RCOG – Grad C). Die maternale Mortalität ist nicht messbar und wird in Industrieländern nur kasuistisch berichtet.
7. Das Risiko für einen kindlichen Todesfall bei primärer Re-Sectio ist extrem gering. Es gibt eine gering gesteigerte kindliche respiratorische Morbidität, insbesondere bei Entbindung vor 39+0 SSW (RCOG – Grad C).
8. Die Schwangere soll darüber aufgeklärt werden, dass jede Re-Sectio zu einer weiteren Steigerung des Risikos einer Plazentationsstörung bei Folgeschwangerschaften führt und Adhäsionen verursachen kann, die zukünftige abdominelle Eingriffe komplizieren können (RCOG – Grad C).
9. Die primäre Re-Sectio sollte idealerweise nach 39+0 SSW erfolgen (RCOG – Grad A).
10. Die Geburt soll in einem Krankenhaus stattfinden. Das Krankenhaus soll über die notwendigen personellen und strukturellen Erfordernisse zur umgehenden Behandlung potenzieller Komplikationen verfügen (alle Guidelines).
11. Bei regelmäßiger Wehentätigkeit soll eine kontinuierliche fetale Überwachung (CTG) erfolgen (alle Guidelines).
12. Es bestehen keine Einschränkungen hinsichtlich peripartaler Analgesie (ACOG – Level 1).
13. Eine Geburtseinleitung bedarf einer medizinischen Indikation (alle Guidelines).
14. Die Schwangere soll darüber aufgeklärt werden, dass eine Geburtseinleitung zu einer 2- bis 3-fachen Risikoerhöhung für eine Uterusruptur (ca. 1–1,5%) und zu einer 1,5-fachen Erhöhung der Sectio-Wahrscheinlichkeit führt (RCOG – Grad D).
15. Die Entscheidung zur Geburtseinleitung und die Wahl der Methode haben unter Einbindung eines Facharztes/einer Fachärztin zu erfolgen (RCOG).
16. Bei Terminüberschreitung ohne Anzeichen eines spontanen Geburtsbeginns soll spätestens bei 41+0 SSW im Rahmen einer geburtshilflichen Untersuchung eine Einschätzung der Erfolgsaussichten für eine vaginale Geburt erfolgen. Als Termin für die Einleitung oder primäre Re-Sectio soll spätestens 41+3 SSW angestrebt werden (RCOG).
17. Es besteht keine Kontraindikation zur Wehenaugmentation mit Oxytocin bei Z. n. Sectio (SOGC – Grad B – Level 2a).
18. Bei reifem Muttermundsbefund (Bishop-Score  $\geq 6$ ) stellt eine Geburtseinleitung mittels Oxytocin und Amniotomie eine risikoarme Methode dar (UpToDate – Level 2, SOGC, ACOG).
19. Die Geburtseinleitung mit mechanischen Methoden (transzervikaler Ballonkatheter, Amniotomie) ist mit einem niedrigeren Risiko als medikamentöse Verfahren (Prostaglandine, Oxytocin) assoziiert (RCOG – Grad D).
20. Misoprostol soll im 3. Trimenon nicht zur Geburtseinleitung bzw. Zervixreifung nach Kaiserschnitt eingesetzt werden (ACOG – Level 1, SOGC – Grad B – Level 3).

## Zielsetzung der Empfehlung

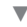

Diese Expertenempfehlung soll einen Überblick und eine Interpretation der Empfehlungen der weltweit führenden Fachgesellschaften darstellen. Sie ist als kompakte Handlungsempfehlung für die Mehrheit der klinischen Standardsituation zu verstehen, kann jedoch nie alle potenziellen Einzelsituationen abdecken. Das individuelle Bewerten aller in der vorliegenden Empfehlung genannten Faktoren, und damit die Entscheidung über den tatsächlichen Entbindungsmodus, bleibt letztendlich im Ermessen der/des verantwortlichen Fachärztin/Facharztes. Im Sinne der leichteren Lesbarkeit wurde weitgehend auf die detaillierte Auflistung der Primärliteratur und die umfangreiche Auflistung von Studiendaten verzichtet. Es wird stattdessen auf die jeweilige Leitlinie und, sofern angegeben, auf den jeweiligen Evidenzgrad bzw. Empfehlungsgrad verwiesen.

## Evidenz- und Empfehlungsgrad

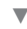

### Level of Evidence

**Level 1a:** Metaanalysen oder systematische Reviews auf der Basis methodisch hochwertiger randomisierter kontrollierter Studien; mehrere hochwertige randomisiert kontrollierte Studien mit sehr geringer Wahrscheinlichkeit eines Bias.

**Level 1b:** wenigstens ein ausreichend großer, methodisch hochwertiger RCT mit geringer Wahrscheinlichkeit eines Bias.

**Level 2a:** systematische Reviews von nicht randomisierten Studien; wenigstens eine hochwertige Studie ohne Randomisierung mit geringer Wahrscheinlichkeit eines Bias.

**Level 2b:** wenigstens eine hochwertige Studie eines anderen Typs wie etwa Vergleichsstudien, Korrelationsstudien oder Fallkontrollstudien.

**Level 3:** nicht analytische Studien, z. B. Fallberichte, Fallserie.

**Level 4:** Meinungen und Überzeugungen von angesehenen Autoritäten (Expert opinion); Consensus von Expertenkommissionen.

### Grad der Empfehlung

**Grad-A-Empfehlung:** Auf Basis zumindest einer randomisierten kontrollierten Studie, eines systematischen Reviews oder einer Metaanalyse von insgesamt guter Qualität und Konsistenz, die sich direkt auf die jeweilige Empfehlung bezieht und nicht extrapoliert wurde (Evidenzlevel 1a und 1b).

**Grad-B-Empfehlung:** Auf Basis gut durchgeführter, aber nicht randomisierter klinischer Studien mit direktem Bezug zur Empfehlung (Evidenzlevel 2a) oder Extrapolation von Evidenzlevel 1, falls der Bezug zur spezifischen Fragestellung fehlt.

**Grad-C-Empfehlung:** Auf Basis gut durchgeführter, aber nicht randomisierter klinischer Studien mit direktem Bezug zur Empfehlung (Evidenzlevel 2b) oder Extrapolation von Evidenzlevel 2a, falls der Bezug zur spezifischen Fragestellung fehlt.

**Grad-D-Empfehlung:** Berichte von Expertenkreisen oder Expertenmeinung und/oder klinische Erfahrung anerkannter Autoritäten (Evidenzlevel 4) sowie direkte Erkenntnisse aus Level 3 oder Extrapolation von Evidenzlevel 2b oder 3, wenn keine direkt anwendbaren klinischen Studien von guter Qualität verfügbar waren.

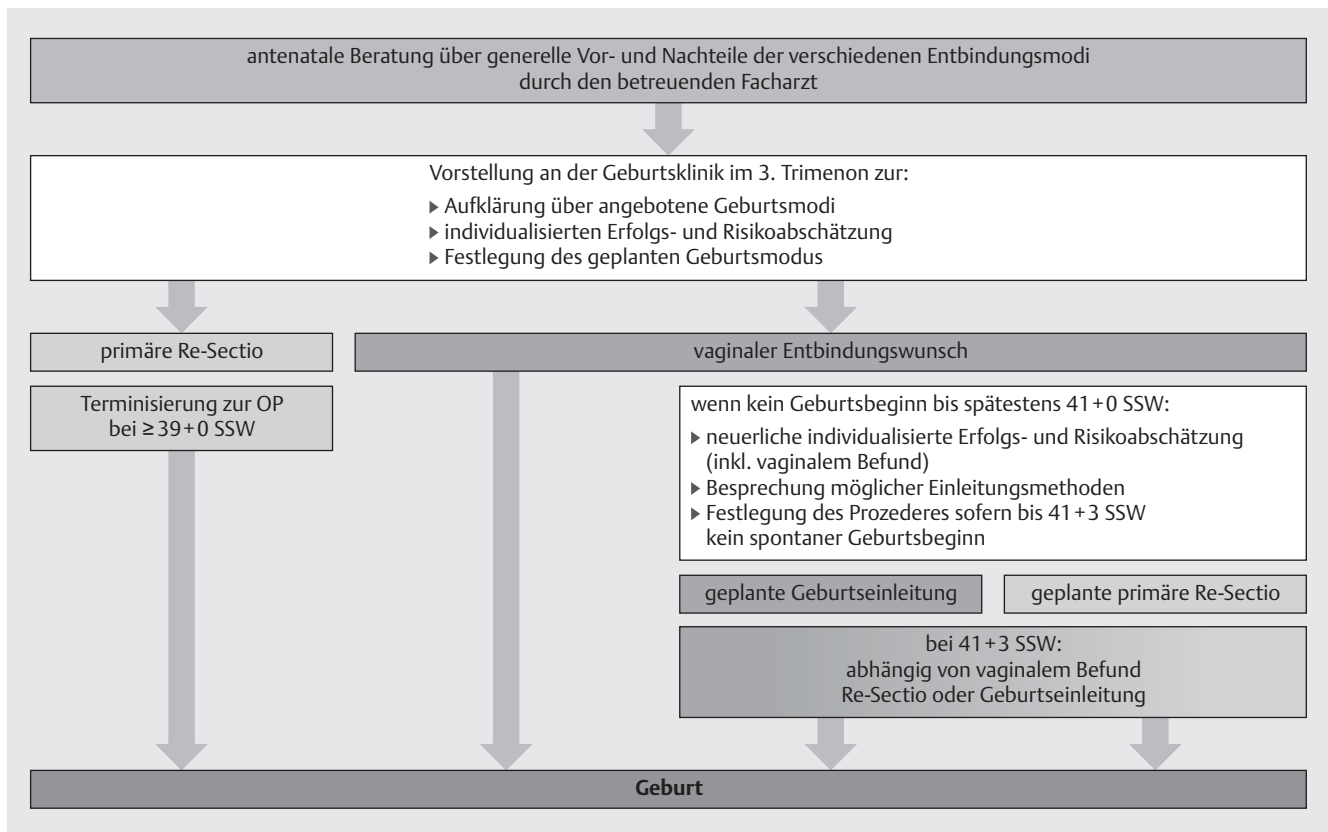

Abb. 1 Flussdiagramm Entscheidungsbaum.

## Leitlinien

Als Grundlage für die vorliegende Expertenempfehlung wurden die Leitlinien weltweit führender Fachgesellschaften Royal College of Obstetrics & Gynaecology (RCOG), American College of Obstetrics & Gynecology (ACOG), Society of Obstetricians and Gynaecologists of Canada (SOGC), French College of Gynecologists and Obstetricians (CNGOF) sowie die Empfehlungen des britischen National Institute for Health and Care Excellence (NICE), der amerikanischen National Institutes of Health (NIH) und der World Health Organisation (WHO) herangezogen. Zusätzlich wurden die sehr aktuellen themenspezifischen Empfehlungen von [www.uptodate.com](http://www.uptodate.com) miteinbezogen.

Bei diesen Guidelines handelt es sich um:

- ▶ NICE Guideline. Inducing labour – Quality standard. 2014 [1]
- ▶ NICE Guideline. Induction of labour. 2008 [1]
- ▶ RCOG Greentop Guideline No 45. Birth after previous Caesarean Birth. 2015 [2]
- ▶ ACOG Practice Bulletin Nr. 115. Vaginal birth after cesarean delivery. 2010 [3]
- ▶ ACOG Practice Bulletin Nr. 107. Induction of Labor. 2009 [4]
- ▶ SOGC clinical practice guideline Nr 155. Guidelines for vaginal birth after previous caesarean birth. 2005 [5]
- ▶ SOGC clinical practice guideline Nr 296. Induction of Labour: Review. 2015 [6]
- ▶ Delivery for women with a previous cesarean: guidelines for clinical practice from the French College of Gynecologists and Obstetricians. 2013 [7]
- ▶ NIH Consensus Development Conference Statement: Vaginal Birth After Cesarean: New Insights. 2010 [8]
- ▶ WHO recommendations for Induction of labour. 2011 [9]

- ▶ UpToDate. Choosing the route of delivery after cesarean birth. 2015 [10]
- ▶ UpToDate. Cervical ripening and induction of labor in women with a prior cesarean delivery. 2015 [11]
- ▶ UpToDate. Use of calculators for predicting successful trial of labor after cesarean delivery. 2015 [12]

Die entsprechenden deutschsprachigen Leitlinien werden derzeit überarbeitet, eine gültige Version existiert zurzeit nicht.

## Einleitung und Hintergrund

Die in den ersten Jahrzehnten des 20. Jahrhunderts geprägte Grundhaltung „einmal Sectio, immer Sectio“ hat ihre Gültigkeit seit Langem verloren. An deren Stelle ist ein differenziertes klinisches Management getreten, welches auf eine individualisierte Abschätzung der Erfolgsaussichten für eine vaginale Geburt in Abwägung mütterlicher und kindlicher Risiken abzielt. Dabei spielt die detaillierte Aufklärung und die Miteinbeziehung der Wünsche der Schwangeren eine immer größere Rolle. Dieser Paradigmenwechsel in der Planung des Geburtsmodus bei Z. n. Kaiserschnitt wurde von allen maßgeblichen Fachgesellschaften und Organisationen mittlerweile nachvollzogen und hat zu einer dahingehenden Überarbeitung der jeweiligen Leitlinien geführt. Vor diesem Hintergrund nimmt auch die Häufigkeit der Situationen, in denen die Geburtshelfer/der Geburtshelfer mit der Geburtsplanung nach vorausgegangenem Kaiserschnitt, der Entscheidung über eine eventuelle Einleitung und der Wahl des Einleitungsmodus konfrontiert ist, stetig zu. Dabei sind Entscheidungen immer individuell zu treffen, und die vorgestellten Handlungsempfehlungen dienen zur Orientierung und Beratungshilfe.

Eine allgemeingültige Favorisierung einzelner Verfahren kann daraus derzeit nicht abgeleitet werden. Dennoch wurde versucht, einen Überblick über Vor- und Nachteile der einzelnen Methoden bereitzustellen und Faktoren zu definieren, die eine erfolgreiche vaginale Geburt wahrscheinlich und damit eine Geburtseinleitung sinnvoll und sicher machen.

### Prädiktive Faktoren für eine erfolgreiche vaginale Geburt

Die Erfolgsrate für eine vaginale Geburt nach Kaiserschnitt wird einheitlich zwischen 60–85% angegeben (SOGC, ACOG, RCOG). Die Indikationen für den vorausgegangenen Kaiserschnitt können als prädiktive Faktoren genutzt werden. So sind z. B. Zustand nach fetalen Fehleinstellungen z. B. Beckenendlage (OR 1,9; 95%-KI: 1,0–3,7) [13], Zustand nach schwangerschaftsinduzierter Hypertonie (OR 2,3; 95%-KI: 1,0–5,8) [13] oder auch vorausgegangene Spontangeburt (OR 1,8; 95%-KI: 1,1–3,1) [13] mit einer Erfolgsrate bis 82% [14] als günstig zu bewerten. Wurden vorangegangene Kaiserschnitte wegen dystoker Wehentätigkeit, Geburtstillstand oder Schädel-Becken-Missverhältnis durchgeführt, ist die Datenlage uneinheitlich, mit teils deutlich reduzierten Erfolgsraten.

Mit steigendem **maternalen Alter** sinkt die Erfolgsrate für eine vaginale Entbindung. Es liegen keine ausreichenden Daten vor, um eine Altersgrenze festzulegen. Die weitere Familienplanung sollte in diesen Fällen in die Entscheidung über den Geburtsmodus miteinfließen (CNGOF).

Höhere Multiparität erhöht die Erfolgsaussichten für eine vaginale Entbindung und reduziert das Risiko einer Uterusruptur.

**Höhergradig Mehrgebärenden** kann daher bevorzugt ein vaginaler Entbindungsversuch angeraten werden (CNGOF).

Präexistenter **Diabetes** reduziert die Erfolgsaussichten für eine vaginale Geburt. Diätetisch gut eingestellter Gestationsdiabetes führt in Abwesenheit von fetaler Makrosomie nicht zu verminderten Erfolgschancen bei vaginalem Entbindungsversuch. Diabetes ist kein Risikofaktor für das Auftreten einer Uterusruptur. Ein vaginaler Entbindungsversuch ist bei allen Formen von Diabetes möglich (CNGOF, SOGC).

**Maternale Adipositas** (BMI > 40) reduziert die Erfolgsrate einer vaginalen Geburt ohne Einfluss auf das Risiko einer Uterusruptur (CNGOF – Level 3). Ab einem BMI > 50 wird aufgrund der geringen Erfolgswahrscheinlichkeit von 13% (CNGOF – Grade C) und der erschwerten Bedingungen im Akutfall eine primäre Re-Sectio empfohlen (CNGOF-Grad C).

Das Risiko einer Uterusruptur steigt, je kürzer das **Intervall zum vorangegangenen Kaiserschnitt** ist. Die Rupturrate bei einem Intervall < 24 Monate wird mit bis zu 2,65% (95%-KI: 1,08–6,46) [15] angegeben. Dennoch ist ein vaginaler Entbindungsversuch bei günstigen geburtshilflichen Rahmenbedingungen auch bei einem Intervall zur Folgeschwangerschaft > 6 Monate möglich (CNGOF – Grad C). Frauen mit einem Entbindungsintervall von 18–24 Monaten sollen explizit über das erhöhte Rupturrisiko aufgeklärt werden (SOGC – Grad B – Level 2b).

Die Erfolgsrate eines **äußeren Wendungsversuchs** scheint durch einen vorausgegangenen Kaiserschnitt nicht beeinflusst zu werden (CNGOF – Level 3, ACOG – Level 2) und ohne Einfluss auf die Rupturrate zu sein (CNGOF – Level 4, ACOG). Ein äußerer Wendungsversuch kann also auch nach einem vorausgegangenen Kaiserschnitt angeboten werden (CNGOF – Grade C, SOGC).

Sowohl die Erfolgsrate für einen vaginalen Entbindungsversuch (CNGOF – Level 3) als auch die Uterusrupturrate (CNGOF – Level 3) sind bei **Zwillingsschwangerschaften** vergleichbar mit Einlingsschwangerschaften. Eine vaginale Entbindung bei Zwillingsschwangerschaft kann ohne erhöhte maternale oder fetale Mortalität oder Morbidität angeboten werden (CNGOF – Grade C, ACOG – Level 2) und hat eine Erfolgsrate von 69–84% (SOGC).

**Fetale Makrosomie** (Geburtsgewicht > 4000 g) reduziert die Erfolgsrate einer vaginalen Entbindung (ACOG). Während die französische und amerikanische Leitlinie von einer Verdoppelung des Uterusrupturrisikos ausgehen (CNGOF-Level 3, ACOG), zitiert die kanadische Leitlinie die Studie von Zelop et al. [16], in der sich keine Erhöhung des Rupturrisikos zeigte. Mit einer verbleibenden Erfolgsrate von > 60% und einem noch immer vertretbar niedrigen Rupturrisiko ist bis zu einem geschätzten Geburtsgewicht von < 4500 g ein vaginaler Entbindungsversuch möglich (CNGOF – Level 3). Schwangerschaften mit einem geschätzten Geburtsgewicht > 4500 g sollten primär einer Re-Sectio zugeführt werden (CNGOF – Grade C).

Die Erfolgsrate bei vaginalem Entbindungsversuch **vor der vollendeten 37. SSW** ist vergleichbar mit einer Termingeburt. Das Uterusrupturrisiko ist niedriger (CNGOF – Level 3). Das neonatale Outcome vor der 37. SSW unterscheidet sich nicht bei primärer Re-Sectio und vaginaler Entbindung (CNGOF – Level 3). Wenn eine Geburt vor der 37. SSW notwendig wird, soll daher – bei Fehlen sonstiger Kontraindikationen – ein vaginaler Entbindungsversuch angeboten werden (CNGOF – Grade C).

**Terminüberschreitungen** reduzieren die Erfolgsrate einer vaginalen Entbindung (ACOG) ohne Einfluss auf das Rupturrisiko (CNGOF – Level 3). Ein vaginaler Entbindungsversuch ist bei Terminüberschreitung möglich (CNGOF – Grade C, SOGC – Grad B – Level 2b).

**Scoring-Systeme**, welche die Wahrscheinlichkeit einer erfolgreichen vaginalen Entbindung voraussagen sollen, haben sich bisher klinisch nicht etabliert (ACOG, CNGOF, NIH, RCOG). Dennoch kann die Verwendung eines Vorhersagerechners, wie er z. B. auf der Homepage des Maternal-Fetal Medicine Units (MFMU) Network zur Verfügung steht (<https://mfmunetwork.bsc.gwu.edu/PublicBSC/MFMU/VGBirthCalc/vagbirth.html>) in die Überlegung hinsichtlich des Geburtsmodus miteinbezogen werden (UpToDate).

### Aufklärung

Die Entscheidung der Schwangeren für einen vaginalen Entbindungsversuch nach Kaiserschnitt wird maßgeblich von den betreuenden ÄrztInnen beeinflusst (SOGC [17,18]). Den niedergelassenen FachärztInnen kommt daher im besonderen Maße schon früh in der Schwangerschaft die Aufgabe zu, eine sachlich fundierte, nicht direktive Aufklärung über Vor- und Nachteile der verschiedenen Entbindungsmodalitäten anzubieten. Das frühe Präjudizieren einer Re-Sectio im Sinne des überholten Leitprinzips „einmal Sectio – immer Sectio“ soll vermieden werden. Darauf aufbauend kann auf Basis einer individualisierten Erfolgs- und Risikoabschätzung im Einklang mit den Wünschen der Patientin der jeweils erfolgversprechendste und sicherste Modus an der Entbindungsabteilung festgelegt werden (Abb. 1). In die schlussendliche Entscheidung über den Geburtsmodus bei Z. n. Kaiserschnitt muss eine Fachärztin/ein Facharzt eingebunden sein.

## Zeitpunkt

Da potenzielle Risikofaktoren bei vaginalem Entbindungsversuch meist schon früh in der Schwangerschaft bekannt sind, kann auch die dahingehende Beratung bereits frühzeitig beginnen (ACOG). Ein abschließendes Beratungsgespräch an der jeweiligen geburtshilflichen Institution soll zeitnah erfolgen, jedoch ausreichend früh, um noch eventuell notwendige Befunde oder Informationen einholen zu können. Die primäre Re-Sectio sollte idealerweise nach 39 + 0 SSW erfolgen (RCOG – Level 1).

Im Falle einer Geburtseinleitung muss je nach gewählter Einleitungsmethode über den möglichen **Off-Label-Use** des Medikaments oder mechanischen Verfahrens hingewiesen und dies auch schriftlich dokumentiert werden.

## Risiken

Die Aufklärung soll eine individualisierte Abschätzung der Vorteile und Risiken von primärer Re-Sectio und vaginalem Entbindungsversuch beinhalten. Der Auswertung der jeweiligen Anamnese unter Berücksichtigung bekannter prädiktiver Faktoren für Erfolg oder Misserfolg eines vaginalen Entbindungsversuchs soll großzügig Platz eingeräumt werden. Hinsichtlich der primären Re-Sectio ist insbesondere die maternale Kurz- und Langzeitmorbidity anzusprechen. Daten über eine mögliche erhöhte kindliche Langzeitmorbidity sind derzeit noch nicht ausreichend konklusiv. Bei vaginalem Entbindungsversuch soll das erhöhte Risiko einer Uterusruptur erwähnt werden. Dabei soll über die gering gesteigerte Inzidenz bei spontaner Wehentätigkeit und die, in Abhängigkeit vom Einleitungsverfahren teils relevant gesteigerte, Rupturwahrscheinlichkeit und die damit verbundenen möglichen maternalen und kindlichen Folgen informiert werden.

## Dokumentation

Die Dokumentation hat den Nachweis über die Aufklärung über mütterliche Risiken (insbesondere Uterusrupturnisiko) und fetale Risiken zu enthalten (ACOG – Level 3). Um eine bestmögliche Beratung, Entscheidungsfindung und Dokumentation zu gewährleisten, wird die Implementierung einer Checkliste oder eines standardisierten Beratungsbogens empfohlen (RCOG – Grad B). Die Dokumentation soll Informationen über die vorangegangene Sectio (insbesondere betreffend die Schnittführung und die Indikation) enthalten. An einigen Zentren wird auch die bei der Erstsectio gemessene Conjugata vera in die Geburtsplanung einbezogen.

Wenn kein OP-Bericht vorliegt und die Uterotomie-Schnittführung nicht bekannt ist, kann, sofern keine dagegensprechenden Informationen vorliegen, von einer transversalen Schnittführung im unteren Uterinsegment ausgegangen werden. Das Fehlen des OP-Berichts des vorausgegangenen Kaiserschnitts stellt keine Kontraindikation gegen einen vaginalen Entbindungsversuch dar (CNGOF, SOGC – Grad B – Level 2b, ACOG – Level 2). Dennoch soll der/die entbindende GeburtshelferIn über das Fehlen des OP-Berichts informiert sein, da ein korporaler Hilfsschnitt bei erschwerter Kindsentwicklung nie ausgeschlossen werden kann.

## Analgesie

Die Schwangere soll darüber aufgeklärt werden, dass es keine Einschränkungen hinsichtlich notwendiger Schmerztherapie gibt (ACOG-Level 1). Es liegen keine Daten darüber vor, dass eine Epiduralanästhesie einen negativen Einfluss auf die Erfolgsrate des vaginalen Entbindungsversuchs hat. Da das häufigste Zeichen einer Uterusruptur die CTG-Veränderung ist, ist eine Verschleierung möglicher Ruptursymptome bei liegender PDA nicht zu be-

fürchten (ACOG). Der plötzliche Anstieg des Analgesiebedarfs soll dennoch eine erhöhte Aufmerksamkeit für eine mögliche Uterusruptur nach sich ziehen (RCOG – Grad D).

## Plan für Wehentätigkeit vor vereinbartem Re-Sectio-Termin

Wenn eine primäre Re-Sectio vereinbart und terminiert wird, soll die Vorgehensweise für den Fall, dass es zuvor zum Geburtsbeginn (Wehentätigkeit, Blasensprung) kommt, besprochen und in der Krankengeschichte festgehalten werden (RCOG).

Bei unerwartetem vorzeitigem Geburtsbeginn oder Fehlen einer präpartalen Beratung und Festlegung des Prozedere hat die Entscheidungsfindung hinsichtlich des Geburtsmodus durch eine/n erfahrene/n GeburtshelferIn/GeburtshelferIn zu erfolgen (RCOG).

## Strukturelle Voraussetzungen und Management

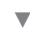

Die Entbindung soll in einem Krankenhaus stattfinden (SOGC – Grad B – Level 2a). Die geburtshilfliche Abteilung soll über die strukturellen und personellen Ressourcen zur Durchführung einer Akutsectio und etwaiger notwendiger Maßnahmen zur Behandlung von Komplikationen verfügen (SOGC – Grad B – Level 2a, CNGOF). Die kanadische Leitlinie empfiehlt eine maximale E-E-Zeit von 30 min (SOGC – Grad C – Level 3); die amerikanische Fachgesellschaft postuliert, dass die personellen Ressourcen „immediately available“ sein müssen (ACOG – Level 3). Die französische Leitlinie empfiehlt weiters, dass eine/ein GeburtshelferIn/GeburtshelferIn mit ausreichenden operativen Fertigkeiten zur notfallmäßigen Hämostase verfügbar sein muss (CNGOF). Die Rechtsprechung in deutschsprachigem Raum geht von einer E-E-Zeit von maximal 20 Minuten aus.

Falls entsprechendes Personal üblicherweise nicht durchgehend vor Ort anwesend sein sollte, muss die Patientin im Vorfeld darüber aufgeklärt werden (ACOG).

Ein Handlungsleitfaden (SOP) für das Management von potenziellen Notfällen soll vorhanden sein (SOGC – Grad C – Level 2).

Bei regelmäßiger Wehentätigkeit wird eine kontinuierliche CTG-Überwachung (SOGC – Grad B – Level 2a, CNGOF, ACOG) empfohlen, da Veränderungen der fetalen Herzfrequenz einheitlich als mögliches erstes Anzeichen einer Uterusruptur angesehen werden (SOGC, CNGOF, ACOG).

Regelmäßige Kontrollen des Geburtsfortschritts sollen erfolgen, da ein prolongierter Verlauf oder frustrane Wehentätigkeit das Risiko einer Uterusruptur erhöhen (SOGC, CNGOF) oder sogar bereits wichtige klinische Zeichen einer Uterusruptur sein könnten. Eine routinemäßige postpartale digitale Exploration des Cavum uteri und der Sectio-Narben-Region ist nicht zielführend (CNGOF, SOGC, ACOG).

Die bildgebende Überprüfung der Dicke des unteren Uterinsegments kann Hinweise auf ein erhöhtes Risiko einer Uterusruptur liefern, stellt jedoch bislang kein etabliertes Standardverfahren dar. Gesicherte Grenzwerte liegen nicht vor (SOGC, UpToDate [19,20]).

## Risiken und Vorteile bei vaginalem Entbindungsversuch und primärer Re-Sectio

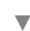

### Maternale Risiken und Vorteile

Übereinstimmend wird in allen untersuchten Leitlinien festgehalten, dass die erfolgreiche Vaginalgeburt nach Kaiserschnitt

die niedrigste und der sekundäre Kaiserschnitt nach erfolglosem vaginalen Entbindungsversuch die höchste **maternale Morbidität** mit sich bringt. Hinsichtlich der maternalen Mortalität sind die Daten uneinheitlich. Während die kanadische Leitlinie von einer erhöhten mütterlichen Mortalität bei vaginalem Entbindungsversuch (OR 1,71 95%-KI: 1,28–2,28) [21] berichtet, gibt die Leitlinie des NIH eine **Mortalitätsrate** von 1,9/100 000 bei vaginalem Entbindungsversuch vs. 9,6/100 000 bei primärer Re-Sectio an.

Das **Risiko einer Uterusruptur** bei vaginalem Entbindungsversuch nach vorausgegangenem Kaiserschnitt ist gering erhöht und wird bei Zustand nach transversaler Inzision im unteren Uterinsegment mit 0,1–1,6% (CNGOF, SOGC, NIH, ACOG) angegeben. Eine Vaginalgeburt – unabhängig, ob vor oder nach dem Kaiserschnitt – gilt als protektiver, die Rupturwahrscheinlichkeit reduzierender Faktor. So sinkt das Risiko einer Uterusruptur mit der Anzahl der vaginalen Geburten nach Sectio von 1,6% (1. vaginale Geburt nach Sectio) auf 0,2% bei 2 dazwischenliegenden vaginalen Geburten (SOGC [22]). Generell muss festgehalten werden, dass die teils stark divergenten Angaben zur Häufigkeit von Uterusrupturen dadurch zu erklären sind, dass kaum sinnvolle Stratifizierungen in asymptomatische Narbendehiszenzen und lebensbedrohliche komplette Rupturen vorliegen (ACOG).

Verglichen damit werden bei geplanter primärer Re-Sectio Rupturraten von 0,03% (NIH) bis 0,19% (SOGC [23]) angegeben. Die Notwendigkeit einer Hysterektomie im Zuge einer Uterusruptur wird mit 14–33% angegeben (NIH).

Die Datenlage hinsichtlich einer möglichen Steigerung der **Hysterektomierate** bei vaginalem Entbindungsversuch ist heterogen; die untersuchten Leitlinien sprechen hier von gleichem Risiko im Vergleich mit der primären Re-Sectio (NIH) bis hin zu einer Verdoppelung (1,6% vs. 0,8; OR: 1,8; 95%-KI: 1,1–3,0) von schweren Komplikationen (SOGC). Allerdings wird in der gleichen Leitlinie auch die Arbeit von Rageth et al. [24] zitiert, die eine Reduktion der Hysterektomierate bei vaginalem Entbindungsversuch angibt (relatives Risiko 0,36; 95%-KI: 0,23–0,56).

Es liegen keine abschließenden Daten hinsichtlich der Art der **Uterotomie** (Fortlauf- vs. Einzelknopfnah oder „locked“ oder „unlocked“ etc.) bezogen auf das Risiko einer Uterusruptur in der Folgeschwangerschaft vor (CNGOF, SOGC).

Übereinstimmend werden eine **geringere febrile Morbidität, seltenere thrombembolische Komplikationen, kürzere Aufenthaltsdauern** und eine **kürzere Gesundungsphase** nach erfolgreicher vaginaler Entbindung angegeben (SOGC, CNGOF, NIH).

Eine vorangegangene Kaiserschnittentbindung führt zu einer gesteigerten Inzidenz von **Placenta praevia** (RR 3,89) und **vorzeitiger Plazentalösung** (RR 2,41) (SOGC [25]). Durch die wiederholte Schnittentbindung steigt die Häufigkeit einer Placenta praevia weiter auf 1,7 und 3% bei 3. Sectio (NIH). Auch bei normaler Plazentalokalisation steigt das Risiko für das Auftreten einer **Placenta accreta, increta oder percreta** von 0,3% nach einem Kaiserschnitt auf 2,4% nach 3 oder mehr Kaiserschnitten.

Insbesondere bei Wunsch nach weiteren Schwangerschaften sind die **potenziellen Folgemorbiditäten** bei wiederholten Kaiserschnitten in die Überlegungen hinsichtlich des Geburtsmodus miteinzubeziehen (SOGC, CNGOF, NIH, ACOG). Dabei werden insbesondere **Plazentationsstörungen**, steigende **Hysterektomiewahrscheinlichkeit**, steigendes **Infektionsrisiko**, **Darm- und Blasenverletzungen** und die Notwendigkeit von **Bluttransfusionen** genannt (ACOG).

## Kindliche Risiken und Vorteile

Während hinsichtlich der maternalen Vor- und Nachteile der unterschiedlichen Entbindungsmodi teils umfangreiche Daten vorliegen, ist die Evidenz betreffend das neonatale Outcome limitiert.

**Perinatale Mortalität** (von der 20. SSW bis zum 28. Lebenstag) und **neonatale Mortalität** (in den ersten 28. Lebenstagen) wird in allen Leitlinien als niedrig, jedoch höher für den vaginalen Entbindungsversuch verglichen mit der primären Re-Sectio angegeben. So wird die perinatale Mortalität mit 0,13 vs. 0,05% (NIH) bzw. mit einer Odds Ratio von OR 1,71 (95%-KI: 1,28–2,28) (SOGC [21]) und die neonatale Mortalität mit 0,11 vs. 0,05% (NIH, CNGOF – Level 2) beziffert. Die kanadische Leitlinie weist in diesem Kontext explizit darauf hin, dass die gesteigerte perinatale Morbidität und Mortalität in direktem Zusammenhang mit dem Auftreten einer Uterusruptur zu verstehen ist (SOGC).

Das Auftreten einer **ischämischen Enzephalopathie** ist insgesamt niedrig, sie tritt signifikant häufiger bei vaginalem Entbindungsversuch auf. Dabei werden Prävalenzen von 0,5–2,3/1000 vs. 0–1,1/1000 angegeben (CNGOF – Level 2).

Das Risiko für das Auftreten einer **neonatalen Sepsis** ist bei vaginalem Entbindungsversuch höher (2 vs. 0%; CNGOF – Level 2) und scheint insbesondere jene Fälle mit frustranem vaginalen Entbindungsversuch und folgender sekundärer Sectio zu betreffen (OR 4,8; 95%-KI: 3,6–9,0; SOGC [26]). Das NIH stuft die Daten zur neonatalen Sepsis jedoch als nicht ausreichend ein.

Im Vergleich mit einer erfolgreichen vaginalen Entbindung scheinen **respiratorische Probleme** (transient respiratory distress) häufiger bei primärer Re-Sectio aufzutreten (6 vs. 3%, OR: 2,3 95%-KI: 1,4–3,8; CNGOF, SOGC, ACOG) wobei die Leitlinie des NIH den diesbezüglichen Evidenzlevel ebenfalls als ungenügend einstuft.

Das Risiko einer **fetalen Hyperbilirubinämie** ist bei primärer Re-Sectio gegenüber dem vaginalen Entbindungsversuch deutlich gesteigert (5,8 vs. 2,2%, ACOG).

Die **kindlichen Langzeitfolgen** nach Kaiserschnittgeburten sind noch nicht ausreichend untersucht.

## Kontraindikation für einen vaginalen Entbindungsversuch

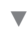

Die Empfehlungen hinsichtlich der **Schnittführung beim vorangegangenen Kaiserschnitt** sind nicht einheitlich. Während die kanadische (SOGC) und die französische (CNGOF) Fachgesellschaft sämtliche von der transversalen Inzision im unteren Uterinsegment abweichende Uterotomie-Schnittführungen als Kontraindikation für einen vaginalen Entbindungsversuch ansehen, sieht die ACOG eine vertikale Inzision im unteren Uterinsegment als keine zwingende Kontraindikation an. Eine vorangegangene klassische (scharfe Eröffnung aller Schichten) oder T-Inzision des Uterus wird von allen Fachgesellschaften als Kontraindikation angesehen.

Bei **Z. n. Uterusruptur** wird generell eine primäre Re-Sectio empfohlen (SOGC, CNGOF, ACOG). Das Risiko einer neuerlichen Ruptur wird mit 6–32% angegeben.

Bei Vorliegen von **Kontraindikationen gegen Wehentätigkeit** (z. B. Placenta praevia, geburtsunmögliche Einstellungsanomalien, ...) ist eine primäre Re-Sectio anzustreben (SOGC, ACOG – Level 2).

Bei Verweigerung der Zustimmung einer Patientin zum vaginalen Entbindungsversuch und klarem **Verlangen nach elektiver Re-Sectio** ist diesem Wunsch Folge zu leisten (SOGC).

Ein **Z. n.  $\geq 3$  Kaiserschnitten** wird einheitlich als Kontraindikation zum vaginalen Entbindungsversuch angesehen. Nach 2 Kaiserschnitten ist von einem erhöhten Uterusruptur-Risiko auszugehen (CNGOF – Level 3), wobei diesbezüglich auch Daten vorliegen, die von keiner signifikanten Risikoerhöhung berichten [27]. Das Risiko wird mit bis zu 3,7% angegeben (SOGC). Ein vaginaler Entbindungsversuch ist bei günstigen geburtshilflichen Voraussetzungen im Einzelfall nach detaillierter Aufklärung möglich (CNGOF – Grad D). Es werden Erfolgsraten von 62–89% (SOGC) angegeben, wobei die größte diesbezügliche Studie von Miller et al. [28] eine Erfolgsrate von 75% und eine Rupturrate von 1,7 vs. 0,6%, verglichen mit der elektiven Kaiserschnittgruppe, angibt. Im Einklang damit wird auch in der amerikanischen Leitlinie eine moderate Morbiditätserhöhung von 2,1 vs. 3,2% bei vaginalem Entbindungsversuch nach 1-maliger gegenüber 2-maliger Sectio angegeben. Die Möglichkeit eines vaginalen Entbindungsversuchs bei diesen Patientinnen wird eingeräumt (ACOG – Level 2). Die Entscheidung zum vaginalen Entbindungsversuch nach 2-maliger Sectio ist eine Einzelfallentscheidung und soll nach umfangreicher Aufklärung durch eine/n erfahrene/n Geburtshelferin/Geburtshelfer erfolgen (RCOG – Grad C).

## Einleitungsverfahren

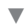

### Abwartendes Vorgehen

Die NICE Guideline empfiehlt die generelle Geburtseinleitung mit 41 + 0 SSW, wobei nicht gesichert ist ob dieser Zeitpunkt auch unkritisch für das Patientinnenkollektiv mit Z. n. Kaiserschnitt übernommen werden kann. Dabei ist einerseits das 1,5–2-fach erhöhte Risiko (0,11 vs. 0,05%) [29] eines intrauterinen Fruchttods ab der 39. SSW bei Z. n. Kaiserschnitt zu erwähnen. Dem gegenüber stehen jedoch das 1,5-fach höhere Risiko einer Akutsectio und das 2- bis 3-fach erhöhte Risiko einer Uterusruptur bei Geburtseinleitung, was ebenfalls die perinatale Morbidität und Mortalität beeinflusst.

In Abwägung dieser Daten empfiehlt das englische RCOG folgendes Vorgehen: Bei Terminüberschreitung ohne Anzeichen für einen spontanen Geburtsbeginn soll bei 41 + 0 SSW eine Untersuchung durch eine/n erfahrene/n Geburtshelferin/Geburtshelfer durchgeführt werden. Dabei soll, neben der Sicherstellung des fetalen Wohlbefindens, mittels vaginaler Untersuchung und Berücksichtigung aller Einflussfaktoren eine Einschätzung der Erfolgsaussichten für eine vaginale Geburt erfolgen. Weiters soll mit der Patientin nochmals über ihre Präferenzen hinsichtlich primärer Re-Sectio, Geburtseinleitung und möglicher Einleitungsmethoden gesprochen werden. Als Termin für die Einleitung oder primäre Re-Sectio soll spätestens 41 + 3 SSW angestrebt werden, wobei der Patientin auch die Möglichkeit eines Wechsels des geplanten Vorgehens (von Re-Sectio auf Geburtseinleitung) bei zwischenzeitlich erfolgversprechenderem Muttermundbefund angeboten werden kann.

### Oxytocin

Im stationären Bereich kann Oxytocin zur Geburtseinleitung bei reifer Zervix verwendet werden (SOGC – Grad B – Level 3, CNGOF – Grad C). Das Risiko einer Uterusruptur wird als minimal bis moderat erhöht eingestuft (CNGOF – Level 2). In einer Untersuchung von 142075 vaginalen Entbindungsversuchen zeigte

sich eine Uterusrupturrate von 0,62%, wobei in 43% der Fälle Oxytocin zum Einsatz kam [30]. Dabei wird von einem gering höheren Rupturrisiko beim Einsatz von Oxytocin zur Weheninduktion verglichen mit Oxytocin zur Wehenaugmentation (1,1 vs. 0,8%) berichtet (ACOG [31]). Eine unreife Zervix (Bishop-Score < 6) erhöht dabei das Rupturrisiko signifikant (ACOG). Schwangere mit einer vorausgegangen Spontangeburt haben ein signifikant niedrigeres Rupturrisiko (1,5 vs. 0,8%) (ACOG, RCOG [32]). Es besteht eine Dosis-Risiko-Assoziation, wobei keine maximale Obergrenze für die Oxytocin-Dosis etabliert ist (ACOG [32]). Die vorausgegangene Gabe von Prostaglandinen birgt ein höheres Rupturrisiko (1,4–2,24%) als die alleinige Oxytocin-Applikation (ACOG [31,33]).

### Prostaglandin E2

Hinsichtlich des Einsatzes von Prostaglandin E2 ist die Datenlage uneinheitlich und sind die Empfehlungen widersprüchlich. So wird von der amerikanischen Fachgesellschaft ACOG der Einsatz von Prostaglandin E2 nur bei Frauen mit einer guten Chance für eine erfolgreiche vaginale Entbindung empfohlen. Dabei werden sowohl Studien zitiert, die kein erhöhtes Risiko [31] angeben, als auch solche, die ein erhöhtes Risiko [33] zeigen, oder solche, die ein erhöhtes Rupturrisiko nur in Verbindung mit nachfolgendem Oxytocin-Einsatz [34] gefunden haben. Im Einklang damit empfiehlt die französische Leitlinie einen zurückhaltenden Einsatz von Prostaglandin E2 nach Abwägen der Erfolgsaussichten unter Einbeziehung aller relevanten geburtshilflichen und maternalen Einflussgrößen.

Im Gegensatz dazu lehnt die kanadische Leitlinie den Einsatz von Prostaglandin E2 zur Geburtseinleitung ab, außer in speziellen Einzelfällen nach expliziter Aufklärung (SOGC – Grad B – Level 2). Das Risiko einer Uterusruptur wird als signifikant höher als bei Amniotomie/Oxytoxin/Foley-Katheter-Anwendung beschrieben [35]. Während die 2008 erschienene englische NICE Guideline noch einen recht liberalen Zugang zum Prostaglandin-E2-Einsatz vertritt, rät das englische RCOG in der aktuellen Green-top-Leitlinie zum zurückhaltenden Einsatz von Prostaglandin E2 und einer Limitierung der Gesamt-Prostaglandin-Exposition. Hierbei wird auf die NICHD-Studie [31] verwiesen, die ein geringeres Risiko bei Amniotomie/Foley-Katheter angibt, wobei gleichzeitig aus einem rezenten Cochrane Review [36] zitiert wird, der besagt, dass für eine sichere Aussage hinsichtlich der Einleitungsmethode mit dem geringsten Risiko keine ausreichende Evidenz vorliegt. Bei Verwendung von Prostaglandin E2 bei Frauen nach Kaiserschnitt muss auf den „off-label use“ explizit hingewiesen werden.

### Misoprostol

Wenngleich bisherige Erfahrungen mit Misoprostol auf kleinen Fallzahlen beruhen, sprechen sich nahezu alle Fachgesellschaften gegen den Einsatz von Misoprostol bei Z. n. Kaiserschnitt aus. Von der RCOG liegt dazu keine Empfehlung vor. Bei bisher berichteten Rupturraten bis 18,8% [37] und dem Abbruch von prospektiven Vergleichsstudien [38] aufgrund inakzeptabel hoher Rupturraten, sind Daten aus größeren Studien zukünftig nicht zu erwarten. Inwieweit veränderte Dosierungsschemata oder alternative (orale) Applikationsformen untersucht werden und damit zu einer Änderung der Datenlage führen könnten, lässt sich nicht abschätzen.

## Transzervikale Ballonkatheter

Die WHO empfiehlt den bevorzugten Einsatz von Einleitungsmethoden, die ein geringes Risiko für uterine Hyperstimulation mit sich bringen, und nennt dabei explizit Ballonkatheter (WHO). Eine vertiefte Einbeziehung der Thematik ist für zukünftige WHO-Guidelines angekündigt.

Die kanadische Leitlinie befindet den Einsatz von Foley-Kathetern als akzeptable und sichere Methode (SOGC-Grad A – Level 2) und nennt den Doppelballon-Katheter als Second-Line-Alternative (SOGC-Grad B – Level 2b). Der Einsatz von Foley-Kathetern scheint dabei mit keiner gesteigerten Uterusruptur-Rate assoziiert zu sein (SOGC [39]).

Die amerikanische Leitlinie gibt das Rupturrisiko als vergleichbar mit spontaner Wehentätigkeit an und empfiehlt den Foley-Katheter als vorteilhafte Option (ACOG).

Eine tiefliegende Plazenta ist als absolute Kontraindikation für den Einsatz eines transzervikalen Ballonsystems zu sehen. Der dahingehende Ausschluss verdient vor dem Hintergrund des häufigeren Auftretens von Plazentationsstörungen (u. a. Placenta praevia) nach Kaiserschnitten gesteigerte Aufmerksamkeit (SOGC).

In Österreich ist nur der Doppel-Ballon-Einleitungskatheter (Cook Med Inc, Bloomington, IN, USA) für Geburtseinleitungen zugelassen. In die Zulassungsstudien waren aber keine Frauen mit vorausgegangenem Kaiserschnitt eingeschlossen worden, weshalb dies formal eine Kontraindikation darstellt. Der Foley-Katheter ist in Österreich gar nicht für Geburtseinleitungen zugelassen. Bei Verwendung transzervikaler Ballonsysteme muss daher auf den „off-label use“ explizit hingewiesen werden.

## Interessenkonflikt

Bei keinem der Autoren liegt ein Interessenkonflikt vor.

## Institute

- 1 Universitätsklinik für Frauenheilkunde und Geburtshilfe, Medizinische Universität Graz, Graz, Österreich
- 2 Universitätsklinik für Gynäkologische Endokrinologie und Reproduktionsmedizin, Medizinische Universität Innsbruck, Innsbruck, Österreich
- 3 Universitätsklinik für Frauenheilkunde und Geburtshilfe der Paracelsus Universität Salzburg, Salzburg, Österreich
- 4 Universitätsklinik für Frauenheilkunde und Geburtshilfe, Medizinische Universität Wien, Wien, Österreich
- 5 Universitätsklinik für Gynäkologie und Geburtshilfe, Medizinische Universität Innsbruck, Innsbruck, Österreich

## Literatur

- 1 *National Institute for Health and Care Excellence*. NICE Guidance and guidelines. Induction of labour. 2008. Online: <https://www.nice.org.uk/guidance/qs60>; Stand: 07.01.2016
- 2 *Royal College of Obstetricians and Gynaecologists*. RCOG Green-top Guideline No. 45: Birth after previous caesarean birth. October 2015. Online: [https://www.rcog.org.uk/globalassets/documents/guidelines/gtg\\_45.pdf](https://www.rcog.org.uk/globalassets/documents/guidelines/gtg_45.pdf); Stand: 07.01.2016
- 3 *American College of Obstetricians and Gynecologists*. ACOG Practice bulletin no. 115: Vaginal birth after previous cesarean delivery. *Obstet Gynecol* 2010; 116 (2 Pt 1): 450–463
- 4 *ACOG Committee on Practice Bulletins – Obstetrics*. ACOG Practice Bulletin No. 107: Induction of labor. *Obstet Gynecol* 2009; 114 (2 Pt 1): 386–397
- 5 *Society of Obstetricians and Gynaecologists of Canada*. SOGC clinical practice guidelines. Guidelines for vaginal birth after previous caesarean birth. Number 155 (Replaces guideline Number 147), February 2005. *Int J Gynaecol Obstet* 2005; 89: 319–331
- 6 *Leduc D, Biringer A, Lee L et al*. Induction of labour: review. *J Obstet Gynaecol Can* 2015; 37: 380–383

- 7 *Sentilhes L, Vayssière C, Beucher G et al*. Delivery for women with a previous cesarean: guidelines for clinical practice from the French College of Gynecologists and Obstetricians (CNGOF). *Eur J Obstet Gynecol Reprod Biol* 2013; 170: 25–32
- 8 *National Institutes of Health Consensus Development Conference Panel*. National Institutes of Health Consensus Development Conference Statement: Vaginal birth after cesarean: new insights March 8–10, 2010. *Obstet Gynecol* 2010; 115: 1279–1295
- 9 *World Health Organization*. WHO recommendations for induction of labour. WHO. Published 2011. Online: [http://www.who.int/reproductivehealth/publications/maternal\\_perinatal\\_health/9789241501156/en/](http://www.who.int/reproductivehealth/publications/maternal_perinatal_health/9789241501156/en/); Stand: 14.01.2016
- 10 *Wells CE, Cunningham FG*. Choosing the route of delivery after cesarean birth. In: Waltham MA, Lockwood CJ, eds. *UpToDate*. UpToDate; 2015. Online: [http://www.uptodate.com/contents/choosing-the-route-of-delivery-after-cesarean-birth?source=see\\_link](http://www.uptodate.com/contents/choosing-the-route-of-delivery-after-cesarean-birth?source=see_link); Stand: 14.01.2016
- 11 *Wing DA*. Cervical ripening and induction of labor in women with a prior cesarean delivery. In: Waltham MA, Lockwood CJ, eds. *UpToDate*. UpToDate; 2015. Online: [http://www.uptodate.com/contents/cervical-ripening-and-induction-of-labor-in-women-with-a-prior-cesarean-delivery?source=see\\_link#H5](http://www.uptodate.com/contents/cervical-ripening-and-induction-of-labor-in-women-with-a-prior-cesarean-delivery?source=see_link#H5); Stand: 14.01.2016
- 12 *Metz TD*. Use of calculators for predicting successful trial of labor after cesarean delivery. In: Waltham MA, Ramin S, eds. *UpToDate*. UpToDate; 2015. Online: [http://www.uptodate.com/contents/use-of-calculators-for-predicting-successful-trial-of-labor-after-cesarean-delivery?source=see\\_link](http://www.uptodate.com/contents/use-of-calculators-for-predicting-successful-trial-of-labor-after-cesarean-delivery?source=see_link); Stand: 14.01.2016
- 13 *Weinstein D, Benschushan A, Tanos V et al*. Predictive score for vaginal birth after cesarean section. *Am J Obstet Gynecol* 1996; 174 (1 Pt 1): 192–198
- 14 *McMahon MJ, Luther ER, Bowes WA et al*. Comparison of a trial of labor with an elective second cesarean section. *N Engl J Med* 1996; 335: 689–695
- 15 *Bujold E, Mehta SH, Bujold C et al*. Interdelivery interval and uterine rupture. *Am J Obstet Gynecol* 2002; 187: 1199–1202
- 16 *Zelop CM, Shipp TD, Repke JT et al*. Outcomes of trial of labor following previous cesarean delivery among women with fetuses weighing > 4000 g. *Am J Obstet Gynecol* 2001; 185: 903–905
- 17 *Kline J, Arias F*. Analysis of factors determining the selection of repeated cesarean section or trial of labor in patients with histories of prior cesarean delivery. *J Reprod Med* 1993; 38: 289–292
- 18 *McMahon MJ*. Vaginal birth after cesarean. *Clin Obstet Gynecol* 1998; 41: 369–381
- 19 *Rozenberg P, Goffinet F, Phillippe HJ et al*. Ultrasonographic measurement of lower uterine segment to assess risk of defects of scarred uterus. *Lancet* 1996; 347: 281–284
- 20 *Rozenberg P, Goffinet F, Phillippe HJ et al*. Thickness of the lower uterine segment: its influence in the management of patients with previous cesarean sections. *Eur J Obstet Gynecol Reprod Biol* 1999; 87: 39–45
- 21 *Mozurkewich EL, Hutton EK*. Elective repeat cesarean delivery versus trial of labor: a meta-analysis of the literature from 1989 to 1999. *Am J Obstet Gynecol* 2000; 183: 1187–1197
- 22 *Shimonovitz S, Botosneano A, Hochner-Celnikier D*. Successful first vaginal birth after cesarean section: a predictor of reduced risk for uterine rupture in subsequent deliveries. *Isr Med Assoc J* 2000; 2: 526–528
- 23 *Rosen MG, Dickinson JC, Westhoff CL*. Vaginal birth after cesarean: a meta-analysis of morbidity and mortality. *Obstet Gynecol* 1991; 77: 465–470
- 24 *Rageth JC, Juzi C, Grossenbacher H*. Delivery after previous cesarean: a risk evaluation. Swiss Working Group of Obstetric and Gynecologic Institutions. *Obstet Gynecol* 1999; 93: 332–337
- 25 *Hemminki E, Meriläinen J*. Long-term effects of cesarean sections: ectopic pregnancies and placental problems. *Am J Obstet Gynecol* 1996; 174: 1569–1574
- 26 *Hook B, Kiwi R, Amini SB et al*. Neonatal morbidity after elective repeat cesarean section and trial of labor. *Pediatrics* 1997; 100 (3 Pt 1): 348–353
- 27 *Asakura H, Myers SA*. More than one previous cesarean delivery: a 5-year experience with 435 patients. *Obstet Gynecol* 1995; 85: 924–929
- 28 *Miller DA, Diaz FG, Paul RH*. Vaginal birth after cesarean: a 10-year experience. *Obstet Gynecol* 1994; 84: 255–258
- 29 *Smith GCS, Pell JP, Dobbie R*. Caesarean section and risk of unexplained stillbirth in subsequent pregnancy. *Lancet* 2003; 362: 1779–1784



- 30 Chauhan SP, Martin JN, Henrichs CE et al. Maternal and perinatal complications with uterine rupture in 142,075 patients who attempted vaginal birth after cesarean delivery: a review of the literature. *Am J Obstet Gynecol* 2003; 189: 408–417
- 31 Landon MB, Hauth JC, Leveno KJ et al. Maternal and perinatal outcomes associated with a trial of labor after prior cesarean delivery. *N Engl J Med* 2004; 351: 2581–2589
- 32 Cahill AG, Waterman BM, Stamilio DM et al. Higher maximum doses of oxytocin are associated with an unacceptably high risk for uterine rupture in patients attempting vaginal birth after cesarean delivery. *Am J Obstet Gynecol* 2008; 199: 32.e1–32.e5
- 33 Lydon-Rochelle M, Holt VL, Easterling TR et al. Risk of uterine rupture during labor among women with a prior cesarean delivery. *N Engl J Med* 2001; 345: 3–8
- 34 Macones GA, Peipert J, Nelson DB et al. Maternal complications with vaginal birth after cesarean delivery: a multicenter study. *Am J Obstet Gynecol* 2005; 193: 1656–1662
- 35 Ravasia DJ, Wood SL, Pollard JK. Uterine rupture during induced trial of labor among women with previous cesarean delivery. *Am J Obstet Gynecol* 2000; 183: 1176–1179
- 36 Jozwiak M, Dodd JM. Methods of term labour induction for women with a previous caesarean section. *Cochrane Database Syst Rev* 2013; (3): CD009792
- 37 Blanchette HA, Nayak S, Erasmus S. Comparison of the safety and efficacy of intravaginal misoprostol (prostaglandin E1) with those of dinoprostone (prostaglandin E2) for cervical ripening and induction of labor in a community hospital. *Am J Obstet Gynecol* 1999; 180 (6 Pt 1): 1551–1559
- 38 Wing DA, Lovett K, Paul RH. Disruption of prior uterine incision following misoprostol for labor induction in women with previous cesarean delivery. *Obstet Gynecol* 1998; 91 (5 Pt 2): 828–830
- 39 Bujold E, Blackwell SC, Gauthier RJ. Cervical ripening with transcervical foley catheter and the risk of uterine rupture. *Obstet Gynecol* 2004; 103: 18–23
